# Supplementary material
Source: bioRxiv or medRxiv preprint supplement (https://medrxiv.org/highwire/filestream/97232/field_highwire_adjunct_files/0/2020.09.15.20194712-1.pdf)
Supplement: Supplementary file [file 2020.09.15.20194712-1.pdf]

## **Supplementary Tables**

**Table S1: Quality control metrics for all 260 UCLA Health SARS-CoV-2 libraries.**

**Table S2: Lineage assignment for 142 high-quality UCLA Health SARS-CoV-2 genomes.**

**Table S3: Lineage assignment for 59,839 genomes from GISAID.**

**Table S4: B.1.43 lineages found among the GISAID and UCLA Health SARS-CoV-2 genomes.**

## Supplementary Figures

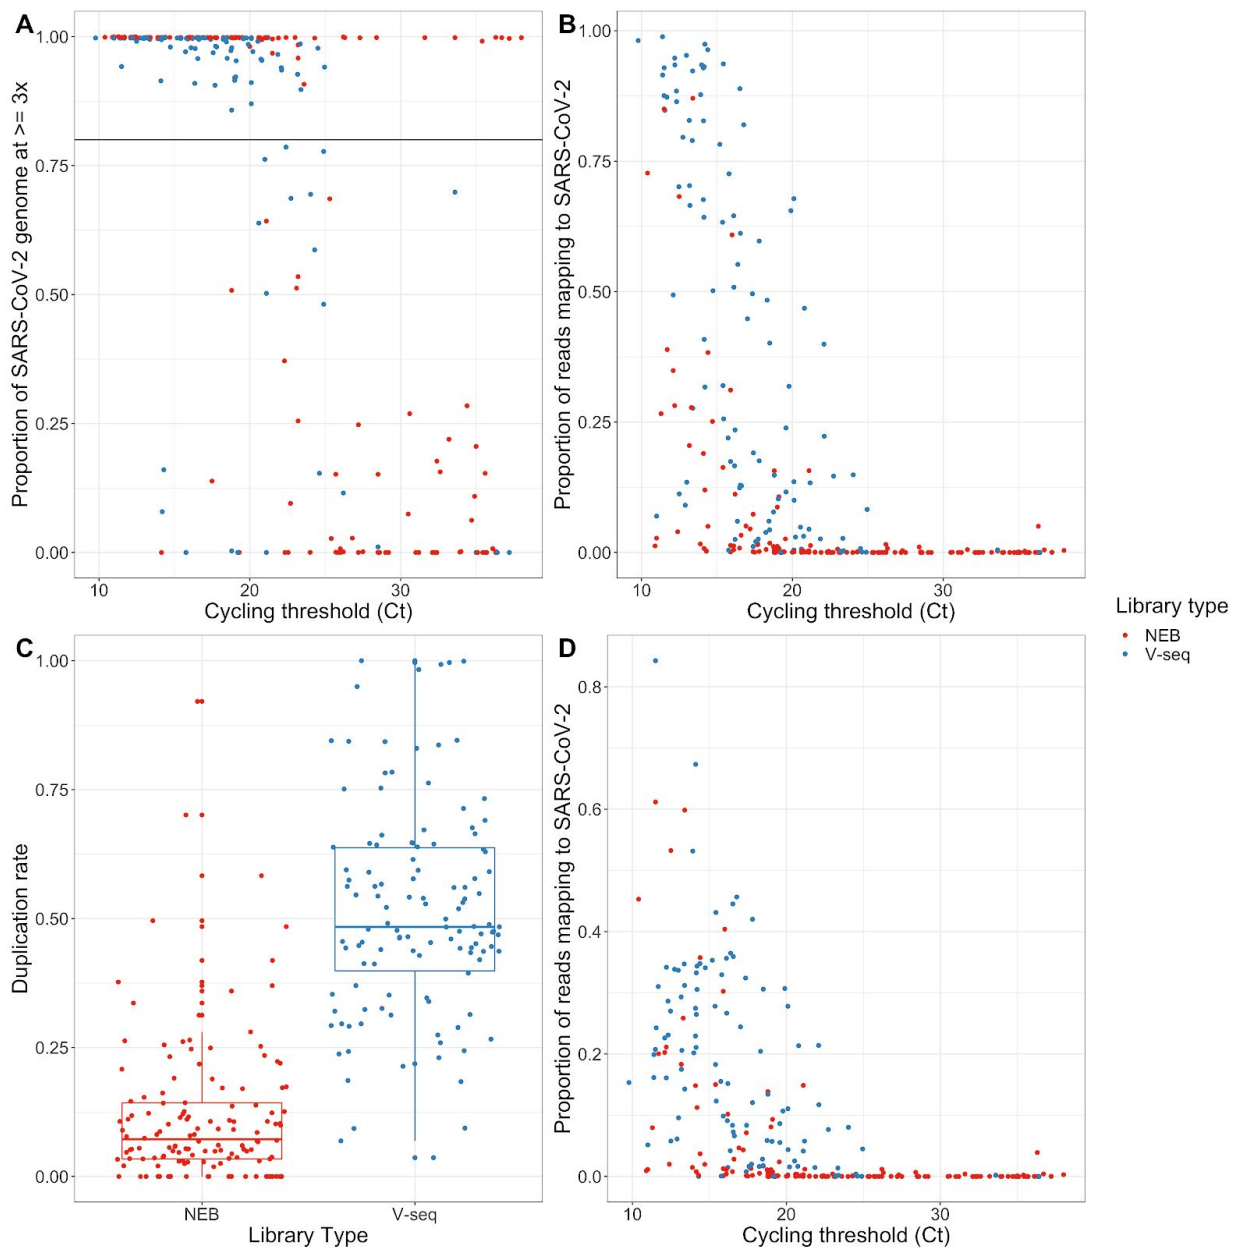

**Figure S1:** Contrasting QC metrics between V-seq and meta-transcriptomics. **A)** Coverage of the SARS2-CoV-2 genome at  $\geq 3x$  compared to the cycling threshold (Ct). The horizontal line in black represents the cut-off for determining whether genomes passed quality-control. **B)** Proportion of reads mapping confidently to SARS-CoV-2 before removing PCR duplicates compared to the Ct. **C)** Read duplication rate for reads mapped to SARS-CoV-2 for both NEB and V-seq libraries. **D)** Proportion of reads mapping confidently to SARS-CoV-2 after removing PCR duplicates.

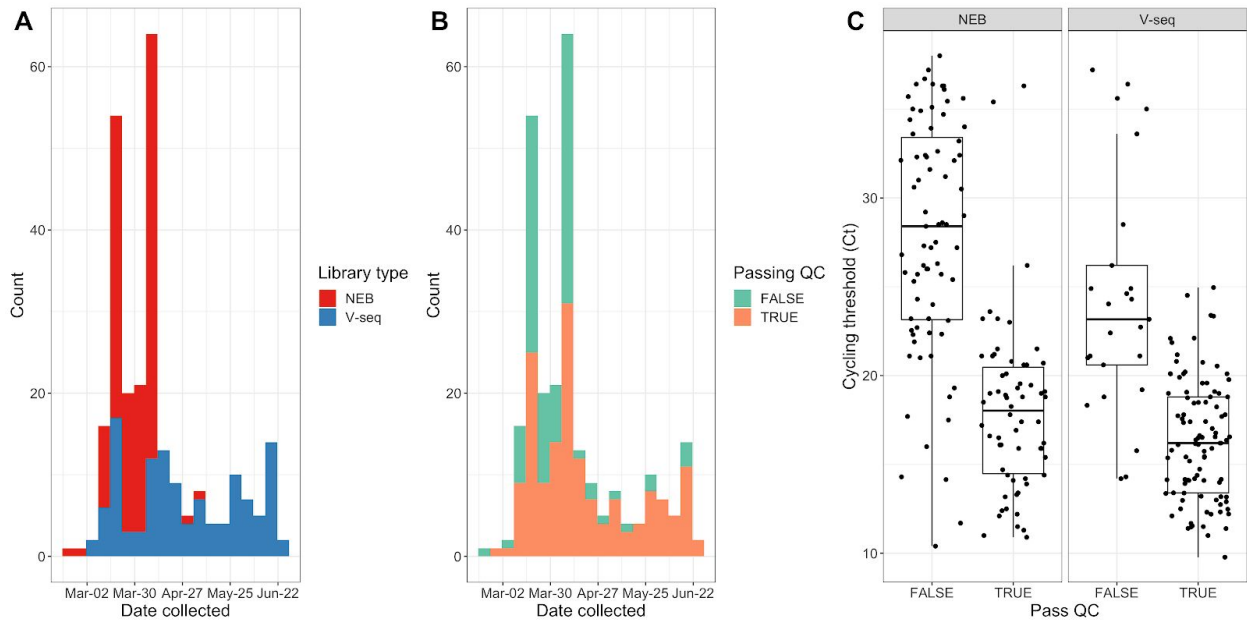

**Figure S2:** Summary of samples collected for sequencing using both V-seq and NEB approaches. **A)** Histogram of collection dates colored by whether they were sequenced using NEB or V-seq methods. **B)** Histogram of collection dates colored by whether the genome passed QC. **C)** Ct values for genomes passing and not passing QC sequencing using NEB and V-seq.

# Sample: U0002

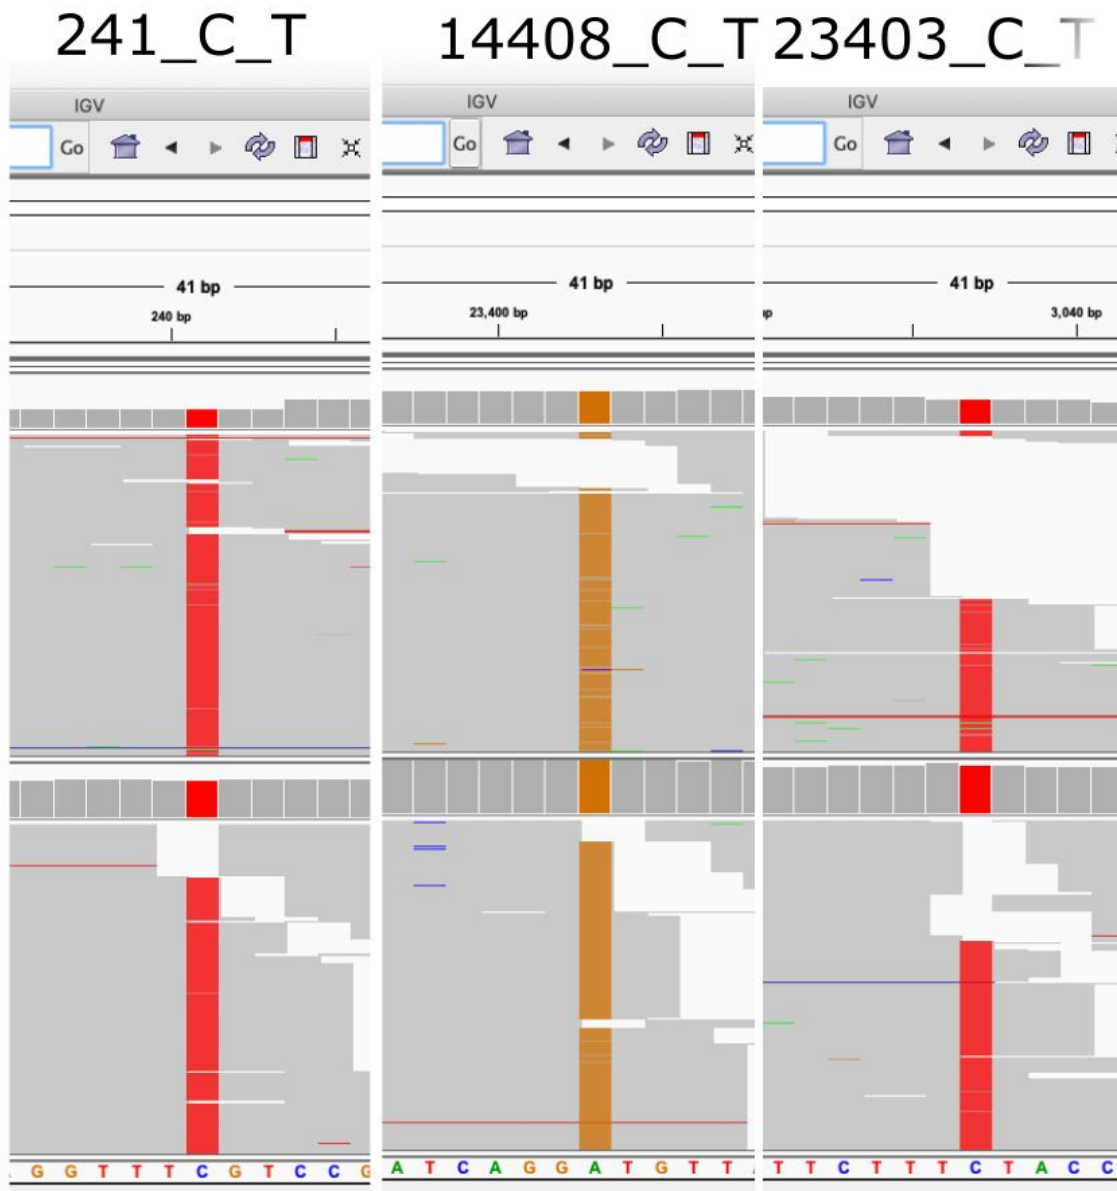

**Figure S3:** Read pileup showing three variant sites across the SARS-CoV-2 genome for a sample (U0002) sequenced using both V-seq (top) and NEB (bottom).

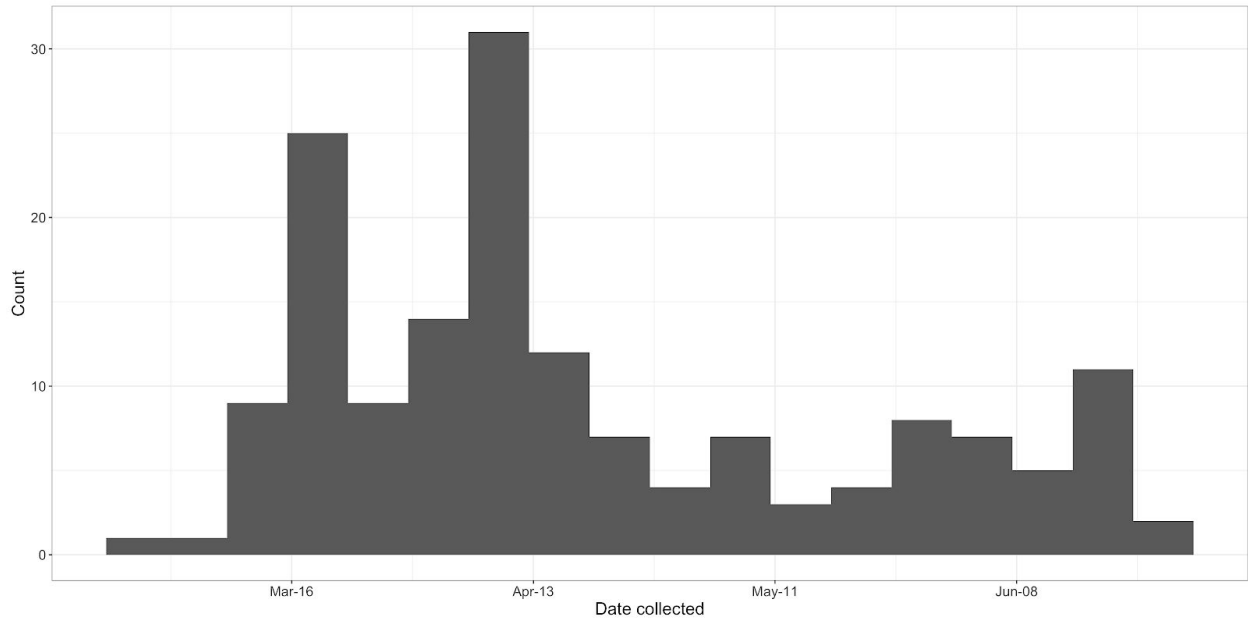

**Figure S4:** Collection dates of high-quality Los Angeles County SARS-CoV-2 genomes from UCLA Health.

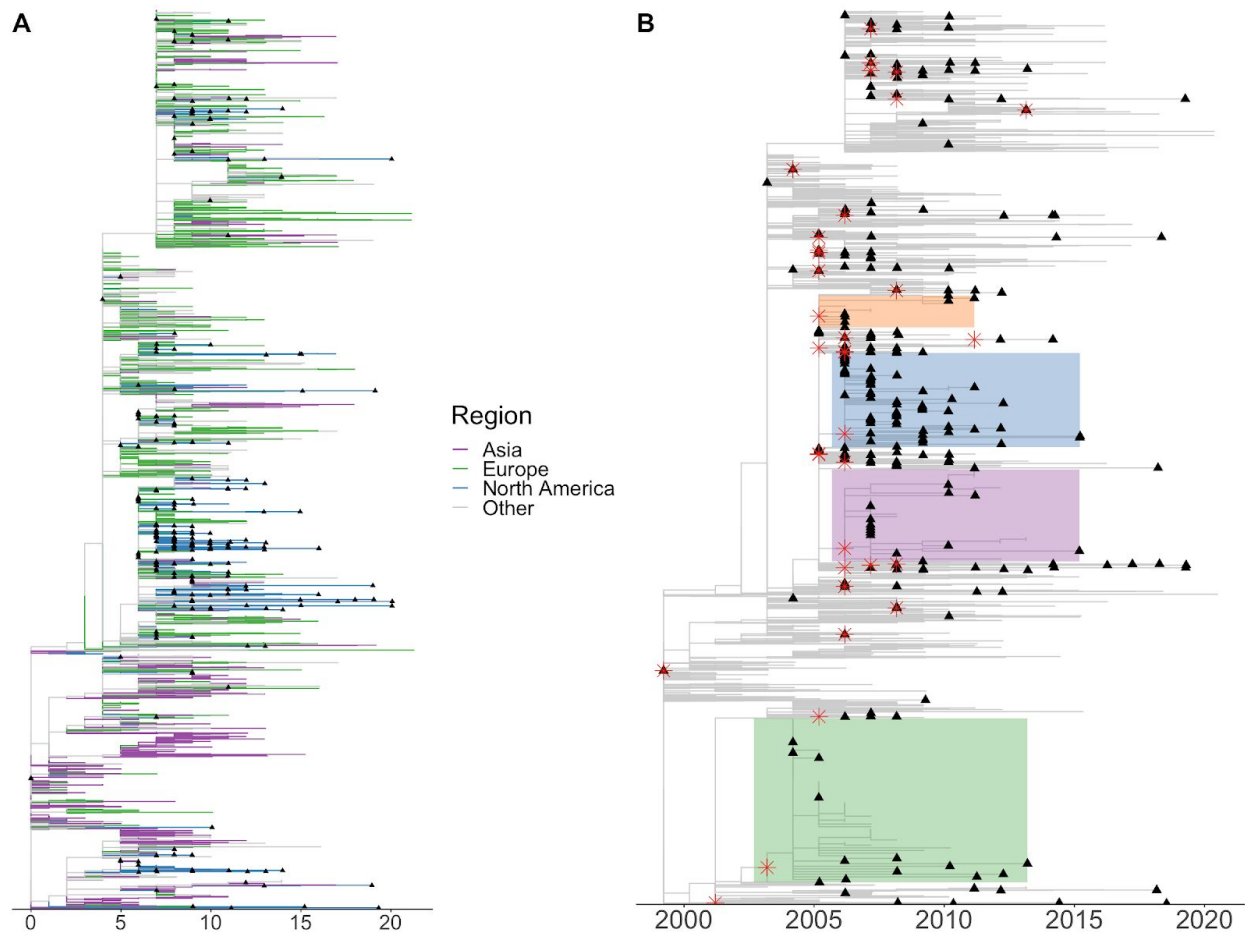

**Figure S5: Multiple introductions of SARS-CoV-2 into LA county.** **A)** Phylogenetic tree of 286 LA County SARS-CoV-2 together with 3,809 genomes sampled from across the world. Branches are colored according to the region of origin. Tip triangles (black) indicate the position of LA county sequences on the tree. In **B)** is the same tree with different annotations. We zoomed in and highlighted four regions (blue, orange, purple, and green) of the tree where a single introduction was related to a cluster containing LA County genomes indicating community transmission. Nodes shown with a red star indicate a LA County introduction related to a cluster with more than one LA County genome. The x-axis is in units of mutations away from the root (NC\_045512).

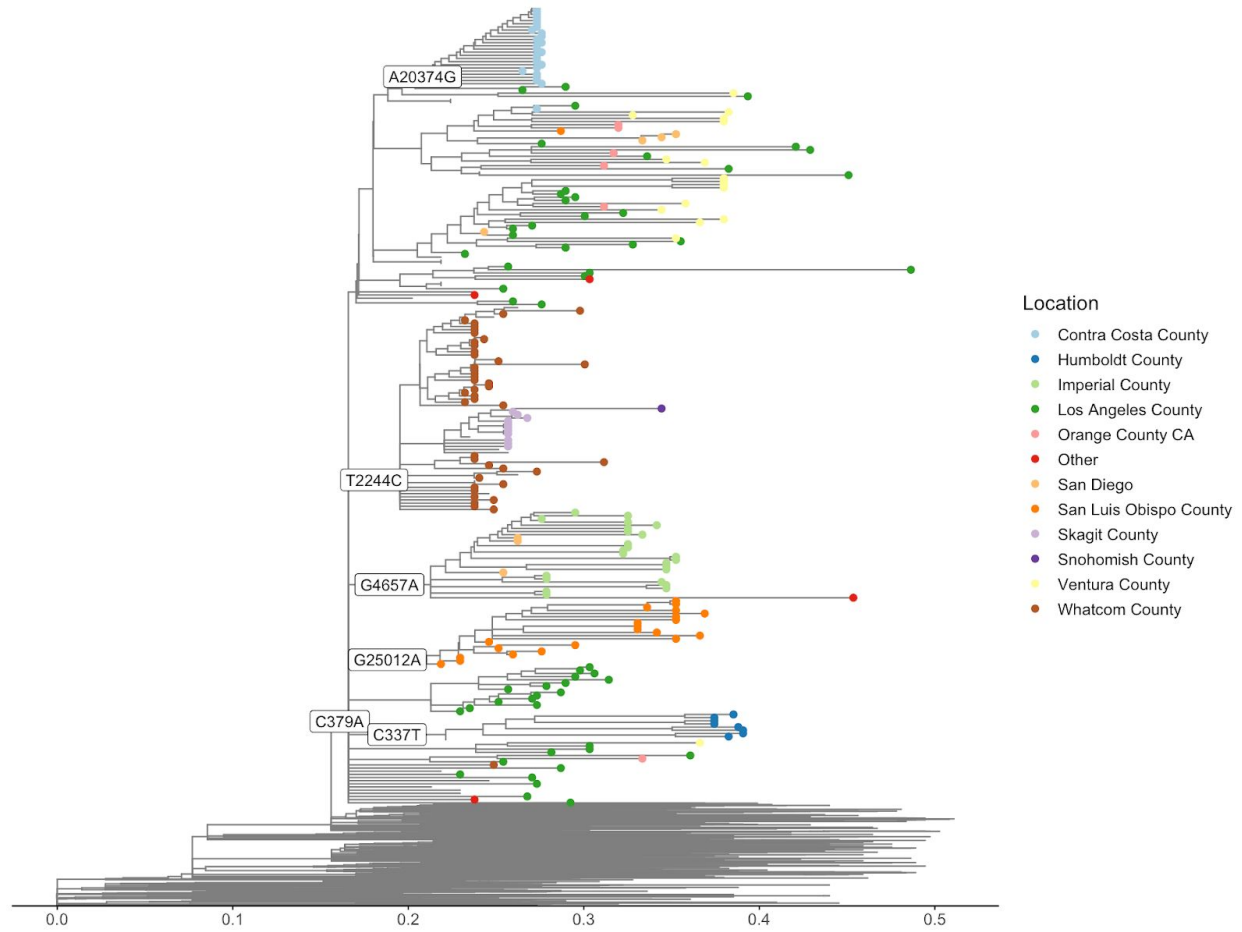

**Figure S6:** Phylogenetic tree of 247 B.1.43 and 987 other SARS-CoV-2 genomes from around the world built using Nextstrain. We have zoomed in on the clade containing all B.1.43 sequences and highlighted the tips according to the county of origin. 6 branches are labelled according to their ancestral mutation. The x-axis is in arbitrary units of time.
